# Supplementary material for: Pharmacological Dissection of the Crosstalk between NaV and CaV Channels in GH3b6 Cells
Source: MDPI journal article supplement (doi:10.3390/ijms23020827), 2022-01-13
Supplement: s1 [file s1]

| gene name      | GenBank accession number | protein name | forward primer (5'-3')   | reverse primer (5'-3')     |
|----------------|--------------------------|--------------|--------------------------|----------------------------|
| <i>Scn1a</i>   | NM_030875                | Nav1.1       | gttccgacatcgccagtt       | catctcagtttcagtagttgtcca   |
| <i>Scn2a</i>   | NM_012647                | Nav1.2       | tgggtgccctggttgag        | ccttatttctgtctcagtagttgtgc |
| <i>Scn3a</i>   | NM_013119                | Nav1.3       | gcaccgtccattctaaccat     | tttagcttctgcataagaattgc    |
| <i>Scn4a</i>   | NM_013178                | Nav1.4       | ggcactgtctcgatttgagg     | ttcatgatggaggggatagc       |
| <i>Scn5a</i>   | NM_013125                | Nav1.5       | tgccaccaatgccttgta       | catgatgagcatgctaagagac     |
| <i>Scn8a</i>   | NM_019266                | Nav1.6       | ggaagtttccatcatgaatcag   | gctgttatgtcgggagagga       |
| <i>Scn9a</i>   | NM_133289                | Nav1.7       | cagcagatgtagaccgactca    | actcgtgaactcagcagcag       |
| <i>Scn10a</i>  | NM_017247                | Nav1.8       | agaggacccaagggaca        | tggtggtttccacacttttg       |
| <i>Scn11a</i>  | NM_019265                | Nav1.9       | cagaggacgatgcctctaaaa    | ttctgggacagtcgtttggt       |
|                |                          |              |                          |                            |
| <i>Scn1b</i>   | NM_017288                | Navβ1        | gcggagatggtgtactgctac    | tcggaagtaatggccaggtat      |
| <i>Scn2b</i>   | NM_012877                | Navβ2        | tggacttaccaggagtgtagca   | ccagcttcagggtgatgatct      |
| <i>Scn3b</i>   | NM_139097                | Navβ3        | ctgatacctttgcgagtcactg   | catcatgatttccgagaccac      |
| <i>Ssn4b</i>   | NM_001008880             | Navβ4        | catcctgaagaagaccagagaga  | agcagggcctcacactttt        |
|                |                          |              |                          |                            |
| <i>Slc8a1</i>  | NM_019268                | NCX1         | tccgattccctctaccgtaa     | gtcagtggctgcttgcac         |
| <i>Slc8a2</i>  | NM_078619                | NCX2         | tgtgcactacgggatgctt      | cgtctccactatcttgacct       |
| <i>Slc8a3</i>  | NM_078620                | NCX3         | gggagctggagttaagaatga    | gaagaaattctcttgcctttcg     |
|                |                          |              |                          |                            |
| <i>Cacna1s</i> | NM_053873                | Cav1.1       | gcgtcgtggagtggaaac       | gggagctggagttaagaatga      |
| <i>Cacna1c</i> | NM_012517                | Cav1.2       | tggtcacagaagtgcaga       | agcatttctgccgtgaaaag       |
| <i>Cacna1d</i> | NM_017298                | Cav1.3       | ccatgctcactgtgtccag      | ctcccatcctatcgcacat        |
| <i>Cacna1a</i> | NM_012918                | Cav2.1       | ctgctttgaagaggggacag     | ctgacatttggcccgttg         |
| <i>Cacna1b</i> | NM_147141                | Cav2.2       | taagcgcacacccgaatg       | ggccaggacaatacagttgg       |
| <i>Cacna1e</i> | NM_019294                | Cav2.3       | taccgcgcctggatagac       | gctgatgtcccagagtttt        |
| <i>Cacna1g</i> | NM_031601                | Cav3.1       | catctacttcattcttctcatcag | aactgcgtggcaatcacc         |
| <i>Cacna1h</i> | NM_153814                | Cav3.2       | acggatactctgcagacagga    | gctctgtgtagtctgggatgc      |
| <i>Cacna1i</i> | NM_020084                | Cav3.3       | tctgcctcaatgttgcacc      | aagggtgtctctagggatgt       |
|                |                          |              |                          |                            |
| <i>Gusb</i>    | NM_017015.2              | Gus          | ctctggtggccttacctgat     | cagactcaggtgttgcacg        |
| <i>Gapdh</i>   | NM_017008.3              | Gapdh        | tgggaagctgggtcatcaac     | gcatcacccatttgatgtt        |

**Table S1 : Primers used for RT-qPCR**
