# Supplementary material for: Pharmacological Dissection of the Crosstalk between NaV and CaV Channels in GH3b6 Cells
Source: MDPI journal article supplement (doi:10.3390/ijms23020827), 2022-01-13
Supplement: s1 [file s1]

**Rhetoré et al., 2021 Supplementary figure S3**

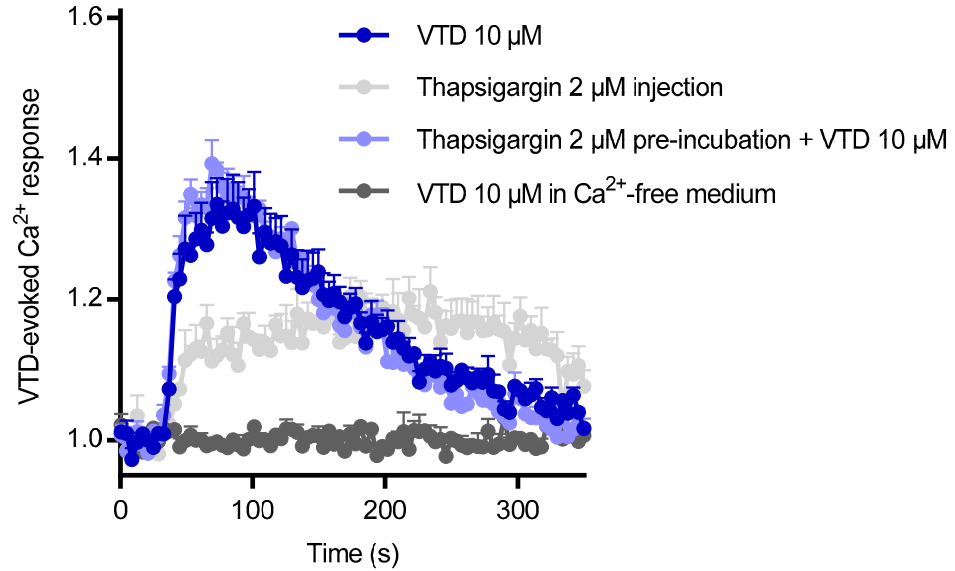

**Figure S3.** Effects of removal of extracellular  $\text{Ca}^{2+}$  or  $\text{Ca}^{2+}$  store depletion on veratridine-induced  $\text{Ca}^{2+}$  response in GH3b6 cells. Representative kinetics of Fura-2 fluorescence in GH3b6 cells treated with 10  $\mu\text{M}$  of veratridine (VTD) in presence or absence of extracellular  $\text{Ca}^{2+}$  from the extracellular medium or after a thapsigargin treatment. The VTD-evoked  $\text{Ca}^{2+}$  response is totally suppressed by  $\text{Ca}^{2+}$  removal from the extracellular medium but not by a thapsigargin pretreatment (2  $\mu\text{M}$ ) which did not impact the VTD-evoked  $\text{Ca}^{2+}$  response. Thus, VTD induced the elevation of intracellular  $\text{Ca}^{2+}$  from extracellular  $\text{Ca}^{2+}$  source.
