# Supplementary material for: Pharmacological Dissection of the Crosstalk between NaV and CaV Channels in GH3b6 Cells
Source: MDPI journal article supplement (doi:10.3390/ijms23020827), 2022-01-13
Supplement: s1 [file s1]

Rhetoré et al., 2021 Supplementary figure S2

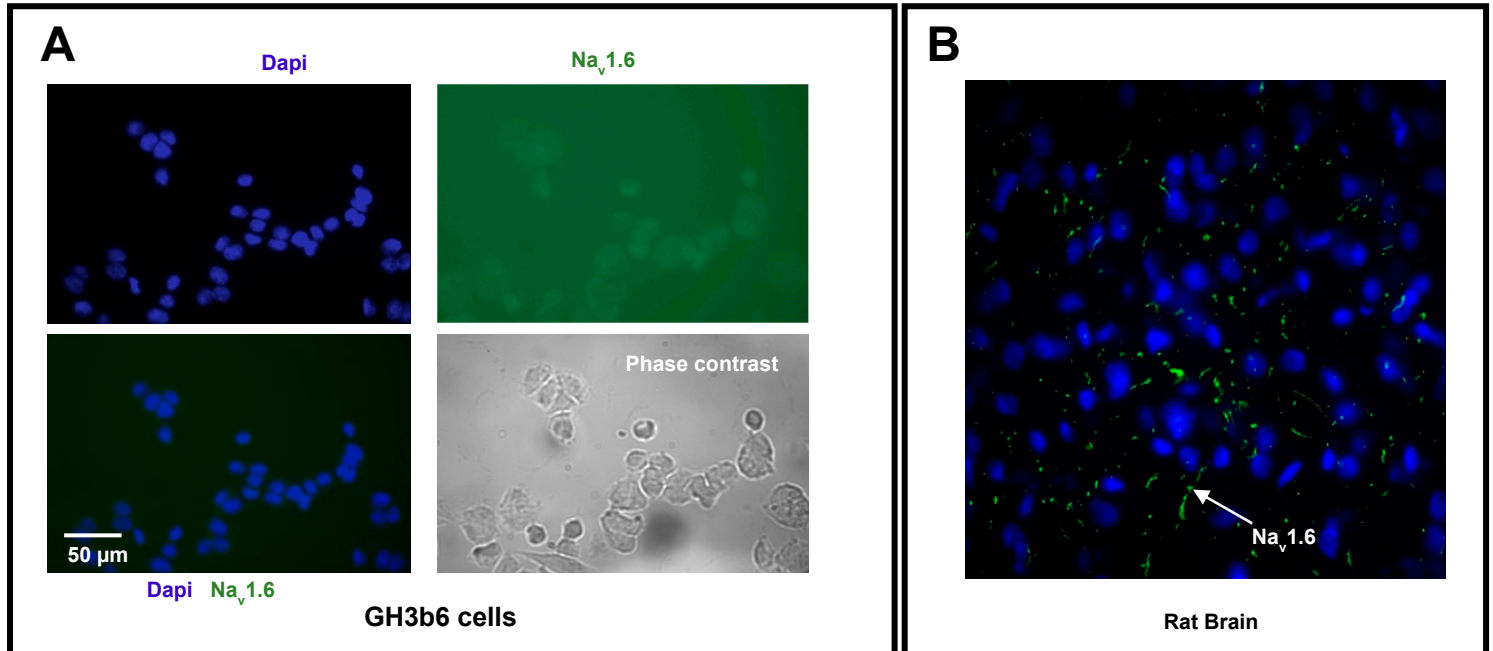

**Figure S2.** Immunocytochemistry on GH3b6 cells using anti-Na<sub>v</sub>1.6 channel antibodies. Immunofluorescence labelling shows the detection of Na<sub>v</sub>1.6 channels (1/50, mouse, clone K87A/70, Neuromab) (green) in rat brain (B) but not at the plasma membrane of GH3b6 cells (A). Nuclei (blue) were stained with DAPI. Arrow shows Na<sub>v</sub>1.6 expression in rat brain using Alexa Fluor 488 anti-mouse secondary antibody. Original magnification x60.
