# Supplementary material for: Pharmacological Dissection of the Crosstalk between NaV and CaV Channels in GH3b6 Cells
Source: Int J Mol Sci. 2022 Jan 13;23(2):827. doi: 10.3390/ijms23020827 (PMC8775721; doi:10.3390/ijms23020827)
Supplement: Supplementary file 1 [file ijms-23-00827-s001.zip]

Archive with 4 entries (4 files):
- Figure S1 Rhetore.pdf
- Figure S2 Rhetore.pdf
- Figure S3 Rhetore.pdf
- Table S1- Rethore 2021.pdf
